# Supplementary material for: New Hybrid Nanomaterial Based on Self-Assembly of Cyclodextrins and Cobalt Prussian Blue Analogue Nanocubes
Source: Int J Mol Sci. 2015 Jun 29;16(7):14594–607. doi: 10.3390/ijms160714594 (PMC4519860; doi:10.3390/ijms160714594)
Supplement: Supplementary file 1 [file ijms-16-14594-s001.pdf]

## Supplementary Information

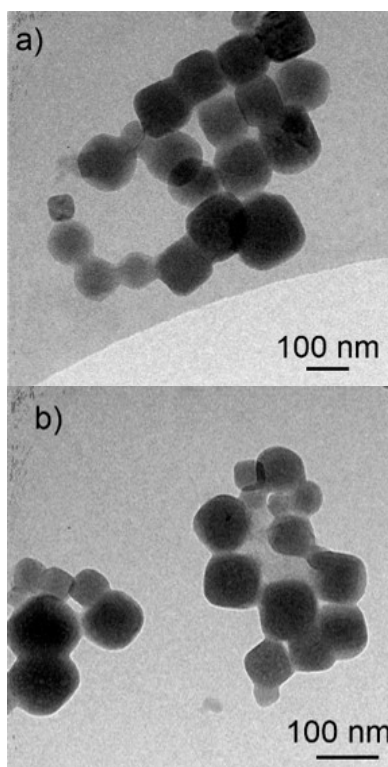

**Figure S1.** TEM images with scale bars in each micrograph measure 100 nm for (a) PAB nanocubes and (b) PAB-CD nanocubes.

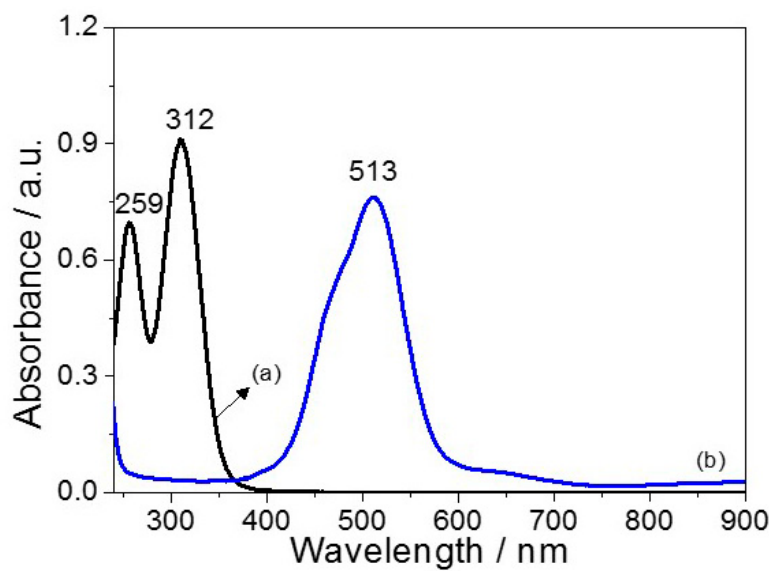

**Figure S2.** UV-Vis spectra for: (a)  $3 \text{ mmol}\cdot\text{L}^{-1} \text{ K}_3[\text{Co}(\text{CN})_6]$  and (b)  $0.1 \text{ mol}\cdot\text{L}^{-1} \text{ Co}(\text{CH}_3\text{COO})_2\cdot 4\text{H}_2\text{O}$  solutions.

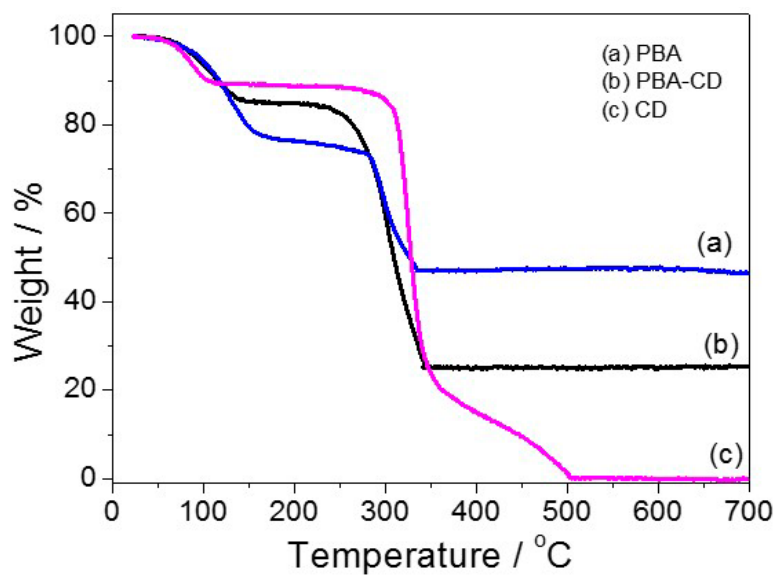

**Figure S3.** The TGA scans for (a) PBA NCs; (b) PAB-CD and (c) CD.

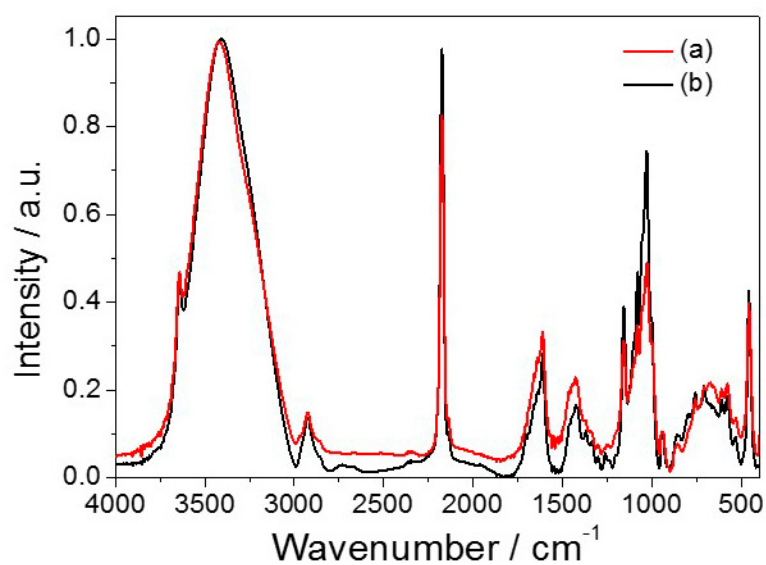

**Figure S4.** FTIR spectra for (a) theoretical spectrum of the mixture (generated from combination of the experimental FTIR spectra of PBA and CD) and (b) experimental spectrum of hybrid.
